# Supplementary material for: Stability and binding interaction of bilirubin on a gold nano-surface: steady state fluorescence and FT-IR investigation
Source: Royal Society of Chemistry journal article supplement (doi:10.1039/c4cp02649g), 2014-01-01
Supplement: c4cp02649g1.pdf [file c4cp02649g1.pdf]

## **Supporting Information**

### **Stability and Binding Interaction of Bilirubin on Gold Nano- surface: Steady State Fluorescence and FT-IR Investigation**

Mritunjoy Maity, Supriya Das and Nakul C Maiti\*

Division of Structural Biology and Bioinformatics; CSIR-Indian Institute of Chemical  
Biology; 4, Raja S.C. Mullick Road, Kolkata, India-700032;  
Fax: (+) 91 33 24735197, 91 33 24723967; Tel: (+) 91 33 24995940

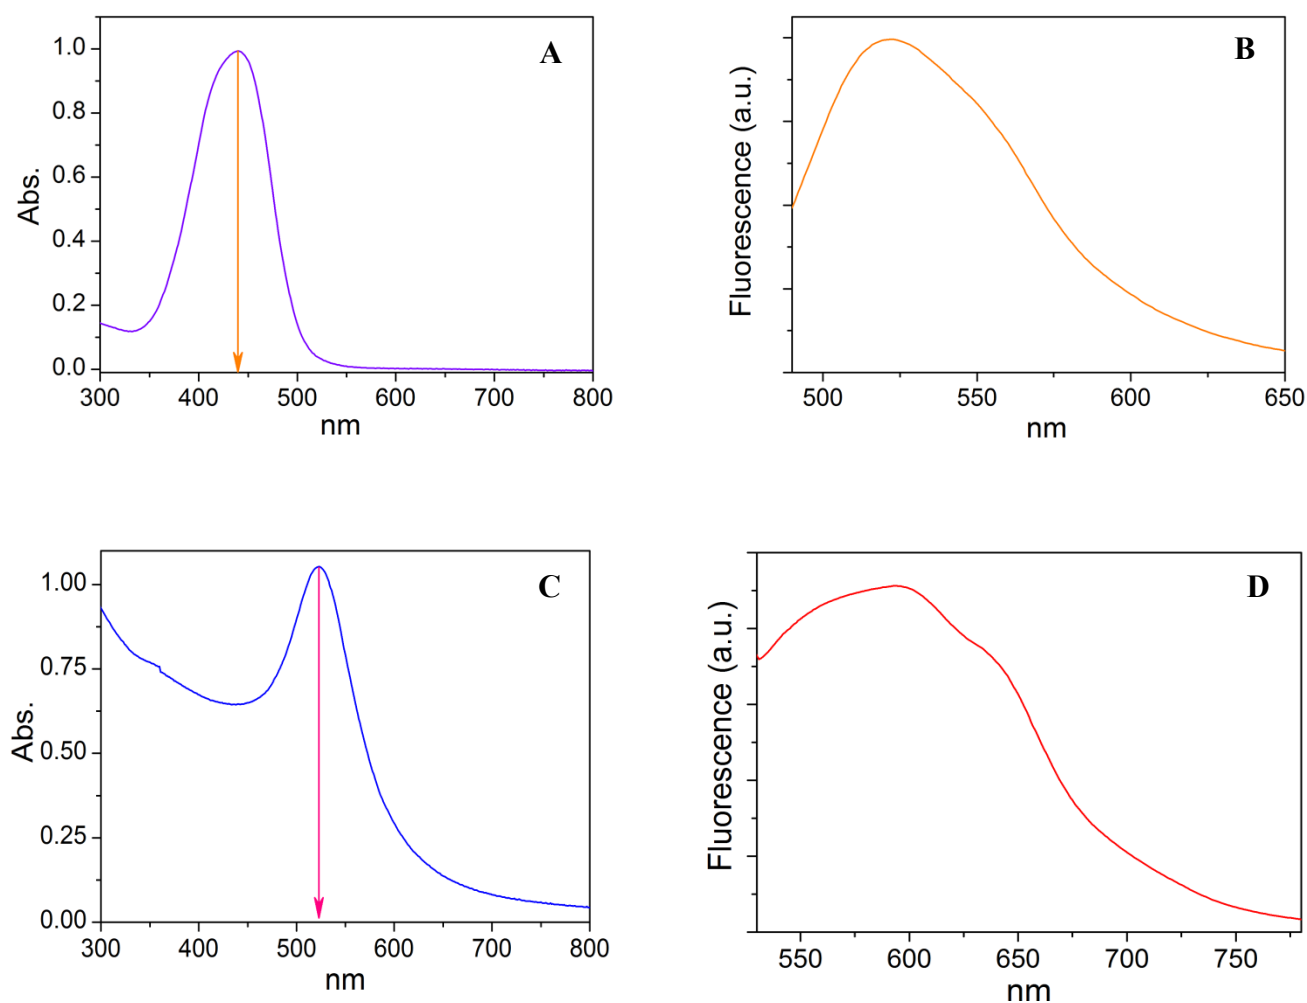

Figure S1: Absorption and fluorescence spectra of BR and AuBR in aqueous solution. (A) Absorption spectra of bilirubin ( $18.7 \mu\text{M}$ ) in 10 mM phosphate buffer at pH 9.0. (B) Fluorescence spectra of bilirubin in the same buffer solution excited at 470 nm with slit width 5 nm each. (C) Absorption spectra of AuBR in water suspension. the particles were produced at pH 9.0 as discussed in the main manuscript. The particle was washed with milli-Q water prior to record the spectra. (D) Fluorescence spectra of AuBR and experiment condition was similar to the previous measurement.

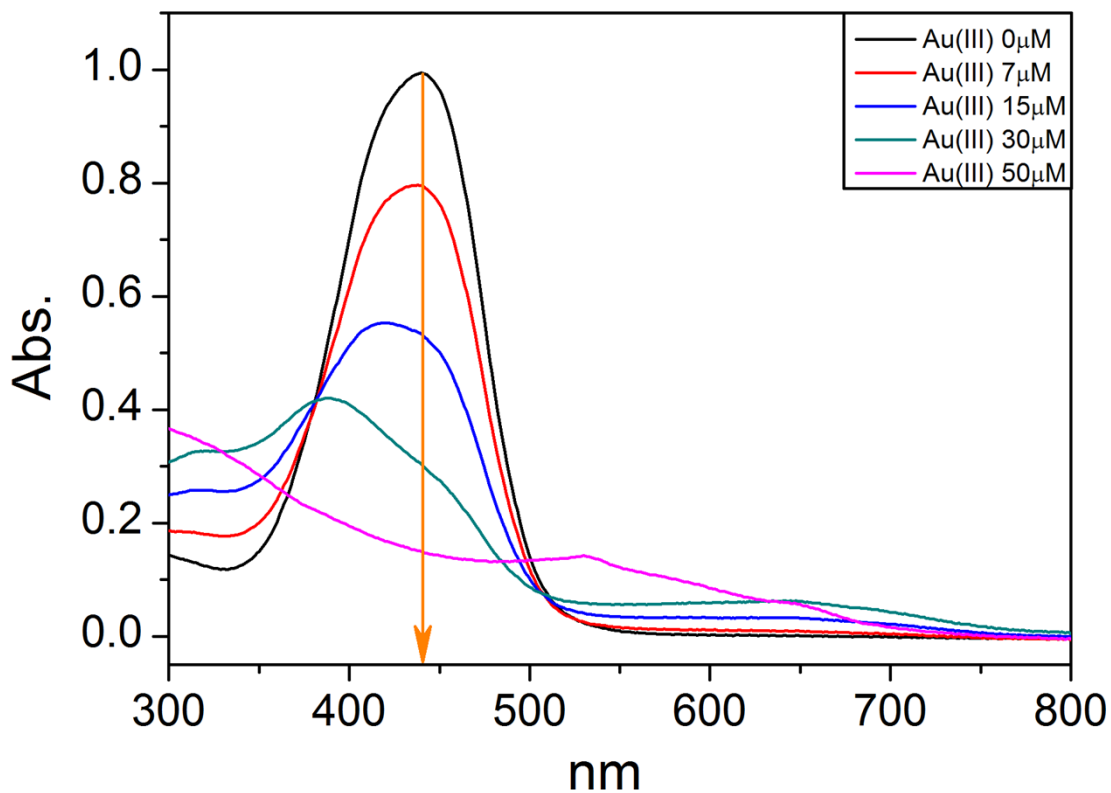

Figure S2: UV-Vis spectra of bilirubin ( $18.75 \mu\text{M}$ ) in phosphate buffer ( $10\text{mM}$ ) at pH 9.0 at in the presence of different concentration Au (III) ion, spectra was collected in 2 minute interval after addition of Au (III) ion solution. The absorption peak was decreasing with the increase of Au (III) ion concentration.
